# Supplementary material for: Differentiation of cerebellar cell identities in absence of Fgf signalling in zebrafish Otx morphants
Source: Oxford University Press journal article supplement (doi:10.1242/dev.02352), 2006-04-13
Supplement: dev02352tables1.pdf [file dev02352tables1.pdf]

**Table S1. Rescue of granular cells in SU5402 treated OtxH embryos**

|                                                              | Wild type + SU5402 |                                | OtxH + SU5402 |                                |
|--------------------------------------------------------------|--------------------|--------------------------------|---------------|--------------------------------|
|                                                              | %/class            | <i>atoh1</i> upper rhombic lip | %/class       | <i>atoh1</i> upper rhombic lip |
| Class 1 (isthmic phenotype)                                  | 36.4%              | 11.1%, <i>n</i> =27            | 33.0%         | 87.5%, <i>n</i> =24            |
| Class 2 (isthmic + eye phenotype)                            | 51.0%              | 23.7%, <i>n</i> =38            | 47.8%         | 82.3%, <i>n</i> =34            |
| Class 3 (isthmic + eye phenotype + telencephalic cell death) | 12.1%              | 22.0%, <i>n</i> =9             | 69.2%         | 69.2%, <i>n</i> =13            |

Isthmic phenotype=absence of isthmic constriction and cerebellum, similar to *ace* phenotype.

Eye phenotype=reduction of the eye size.

Telencephalic cell death=reduction in size and cell death in the telencephalon.

Wild type (*n*=74) and OtxH (*n*=71) embryos were treated with SU5402, classified in three different classes according to the severity of their phenotype (%/class) and scored for their *atoh1* expression in the upper rhombic lip (see Fig. 7G-J).

In the same experiment, control and OtxH embryos were stained for *atoh1*. Untreated wild-type embryos show *atoh1* staining in the upper rhombic lip (*n*=13) and OtxH embryos show expanded *atoh1* upper rhombic lip staining (*n*=19/22).
